# Supplementary material
Source: MDPI journal article supplement (https://www.mdpi.com/2073-4441/16/7/1000)
Supplement: s1 [file s1]

## *Supplementary Files*

# **In-Situ Improvement of the Sediment Microenvironment by Nitrate in Tailwater of Wastewater Treatment Plants Combined with Aerobic Denitrifying Bacteria under Low-DO Regulation**

Junyi Chen <sup>2</sup>, Chao Zhang <sup>4</sup>, Yun Liu <sup>3</sup>, Jie Tian <sup>1,\*</sup> and Jianbo Guo <sup>5</sup>

<sup>1</sup> Tianjin Huanke Environmental Consulting Co., Ltd., Nankai, Tianjin 300191, China

<sup>2</sup> National Engineering Laboratory for Lake Pollution Control and Ecological Restoration, Chinese Research Academy of Environmental Sciences, Beijing 100012, China; chenjy@craes.org.cn

<sup>3</sup> Key Laboratory for Northern Urban Agriculture of Ministry of Agriculture and Rural Affairs, Beijing University of Agriculture, Beijing 102206, China; yun\_liu810@163.com

<sup>4</sup> Tianjin Academy of Eco-Environmental Sciences, Nankai, Tianjin 300191, China; zc2017@tju.edu.cn

<sup>5</sup> Zhongtai Bochao Intelligent Environmental Protection Technology (Suzhou) Co., Ltd., Jiangsu 215128, China; jianbguo@163.com

\* Correspondence: 15614136092@163.com

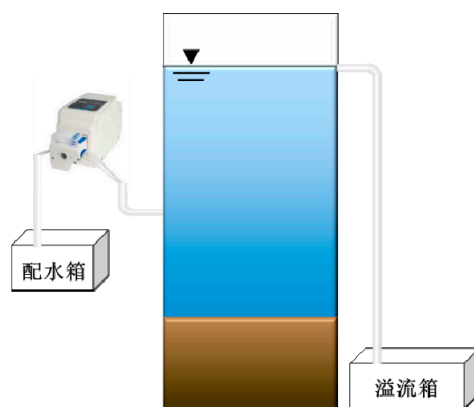

Figure S1: Schema

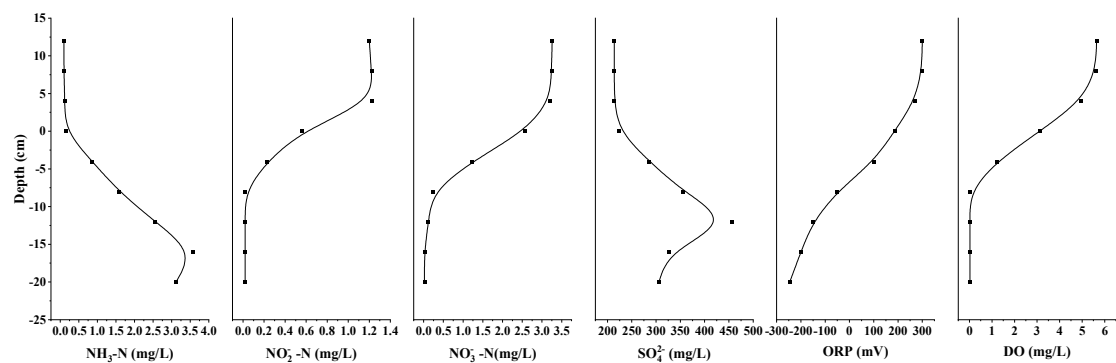

Figure S2: Downcore distribution of NH<sub>3</sub>-N, NO<sub>2</sub><sup>-</sup>-N, NO<sub>3</sub><sup>-</sup>-N, SO<sub>4</sub><sup>2-</sup> ORP and DO in different sediment sections of TailN+CFM+LDO on day 60.
